# Supplementary material
Source: PubMed Central journal article supplement (PMC3059063)

## Supplemental data

### **Molecular control of polyene macrolide biosynthesis: direct binding of the regulator PimM to eight promoters of pimaricin genes. Identification of binding boxes.**

Javier Santos-Aberturas, Cláudia M. Vicente, Susana M. Guerra, Tamara D. Payero, Juan F. Martín, and Jesús F. Aparicio.

**Table S1: Primers used in RT-PCR experiments.**

**Table S2: Primers used for 5' RACE experiments.**

**Table S3: Primers and probes used for the EMSA assays.**

### **Fig. S1: Identification of binding sites.**

DNaseI footprints of the GST-PimM<sup>DBD</sup> protein bound to the promoter regions of *pimK* (A,B), *pimI* (C,D), *pimA* (E,F), *pimE* (G,H). In each panel, the upper electropherogram (blue line) is the control reaction. The protected nucleotide sequence is boxed; hyper sensitive sites (arrows) are also indicated. Sequencing reactions are not included. Coordinates are from the transcriptional start point.

**Table S1: Primers used in RT-PCR experiments**

| <b>Primer</b> | <b>Sequence (5' to 3')</b> | <b>Intergenic region</b> |
|---------------|----------------------------|--------------------------|
| S3S4f         | GCCGTCCTTCAACAACCTGCCAG    | <i>pimS3-pimS4</i>       |
| S3S4r         | GCCCGACGCCCGAACCAG         |                          |
| S2S3f         | CTTCCTGGCTGACGGCGTTGC      | <i>pimS2-pimS3</i>       |
| S2S3r         | CTGCTGAAGCTCGCCGCCG        |                          |
| IS2f          | GCCGCCGCCTCCAGCTCGC        | <i>pimI-pimS2</i>        |
| IS2r          | GACGACCCCAAGACCACGCTG      |                          |
| JIf           | CGTGCGGAAAGCAGACGAGC       | <i>pimJ-pimI</i>         |
| JIr           | CRACTTCCCCGAACCTGATGCG     |                          |
| CGf           | GCGGGACGTGCTGTGGATGTAC     | <i>pimC-pimG</i>         |
| CGr           | GCCATAACCGTTTGCCGTCG       |                          |
| GFf           | GGGACGCTCATCAAGGCGGG       | <i>pimG-pimF</i>         |
| GFr           | CGGACGGGCACAGGGCG          |                          |
| FS0f          | GTCACCCTCCTCACCAGCCC       | <i>pimF-pimS0</i>        |
| FS0r          | CGATACCCGACTCCTGCAACCC     |                          |

**Table S2: Primers used in 5' RACE experiments**

| <b>Primer</b> | <b>Sequence (5' to 3')</b> | <b>Transcription initiation site determination</b> |
|---------------|----------------------------|----------------------------------------------------|
| K-1           | GCAGGAACGGCACGCTCAGTACG    | <i>pimK</i>                                        |
| K-2           | GGCTTGGAGACGGCGGAACTTC     |                                                    |
| K-3           | CCAGCGAGGCGAACTCCACAG      |                                                    |
| S2-1          | CGAGATGACGCTGGTGGTGGTGC    | <i>pimS2</i>                                       |
| S2-2          | CGAAGGCTTCCCAGGAGGACTCC    |                                                    |
| S2-3          | GAAGAAGGAGGCGTCGAACTCGG    |                                                    |
| I-1           | GGGATCGCAGCGGTAGGTCTCC     | <i>pimI</i>                                        |
| I-2           | CGGAGAGCAGCTTCAGTTCGG      |                                                    |
| I-3           | CCACCTCGAAGGCGACCATC       |                                                    |
| J-1           | GGTAGTTGCGGGTGATGAAGTGCC   | <i>pimJ</i>                                        |
| J-2           | CGACGAGGACGCCTGGTAGAACC    |                                                    |
| J-3           | CTCGTCGGGCTGCACCTTGTCG     |                                                    |
| A-1           | GCCACCAGGAGCAGGGAGAGC      | <i>pimA</i>                                        |
| A-2           | GACACGACGACGCCGAACGC       |                                                    |
| A-3           | GGGTGATGTAGCCGCTGTTCG      |                                                    |
| E-1           | GAGCCGCCGCCGACACC          | <i>pimE</i>                                        |
| E-2           | CCAGCCACAGGAACGAGCCG       |                                                    |
| E-3           | GTCGTCGGCGGGCTTGTTCC       |                                                    |
| S1-1          | GGAGGCGATGCTGATGTGATTGC    | <i>pimS1</i>                                       |
| S1-2          | CGCTCGACGGCTTCCCATGC       |                                                    |
| S1-3          | CGGGTCGGAGTGGTAGAGCG       |                                                    |
| D-1           | GCGTCCAGCAGGGTGTCCG        | <i>pimD</i>                                        |
| D-2           | CACCTTCGGCTGCATTTCCAGAACG  |                                                    |
| D-3           | GAGCAGGCGGCGGGTCTCG        |                                                    |

**Table S3: Primers and probes used for the EMSA assays.**

| Putative promoter region | Primer | Sequence (5' to 3') <sup>a</sup>        | Probe size (bp) |
|--------------------------|--------|-----------------------------------------|-----------------|
| <i>pimT</i>              | xTf    | <u>GGATCC</u> GTGCCCGTCACCTCC           | 143             |
|                          | xTr    | GAATTCGTGTGTCCAGGTGACCGTC               |                 |
| <i>pimM-R</i>            | xMf    | CAAGGATCCGAGCTGAAGGTGCTGGAC             | 380             |
|                          | xMr    | GTTGAATTCGTCCCCGTGCCTCTCG               |                 |
| <i>pimK</i>              | pKf    | CCTGGATCCCTGATGCACACCTCGCTG             | 462             |
|                          | pKr    | CAACAAGCTTCACCCGCCAGCACGAG              |                 |
| <i>pimS4</i>             | pS4f   | GGCTATCGGATCCTGCTTGGCGG                 | 384             |
|                          | pS4r   | CCTCCTGGCAGAATTCGAACGGCTC               |                 |
| <i>pimS3</i>             | pS3f   | GCGGTCAGCGGATCCACAGGTCC                 | 362             |
|                          | pS3r   | CGTGCTCGAATTCCTGCTGAAGCTCG              |                 |
| <i>pimS2</i>             | pS2f   | AAATGGATCCTCGCCACCCGCTGCC               | 443             |
|                          | pS2r   | CCGAAGCTTCGACGACCCCAAGACCACGC           |                 |
| <i>pimI</i>              | pIf    | GCGAGCGGGAATTCGGGGACCTGCTG              | 280             |
|                          | pIr    | ACACAGGATCCGCCGTGGTCGTCGTCATGG          |                 |
| <i>pimJ</i>              | pJf    | GACTAAGCTTCACAGCTGGACTGGTCCATCAAGTCGCC  | 465             |
|                          | pJr    | CCGCACCGGATCCGGCTGCGCCAG                |                 |
| <i>pimA</i>              | pAf    | CTGGGCGCAGCCGGATCCGGTGCGG               | 104             |
|                          | pAr    | GATGGATTCGCAGAAGACATAGCAGCACCG          |                 |
| <i>pimE</i>              | pEf    | GAACGGATCCCGCACGGAAGTCCTCATCCAACG       | 432             |
|                          | pEr    | GAGAAAGCTTGCGGCATGAGGGGCGGAGGTGATC      |                 |
| <i>pimC</i>              | pCf    | CATGGATCCGCTACCACAACCTCTACGTCACGGACGGCG | 377             |
|                          | pCr    | GACTAAGCTTCCGTGCGCGACGCCGTTGTAGTCCG     |                 |
| <i>pimS1-D</i>           | pS1Df  | GACTAAGCTTCAGCGGGCTCAGTTTCAGCATTTTGGGC  | 440             |
|                          | pS1Dr  | GAGGGATCCGCTCTCGCTGCTTCGCCTCGGTCTCGTCC  |                 |
| <i>pimH</i>              | xHf    | CGCTGCCGCTGTTGCCG                       | 492             |
|                          | xHr    | GATCCCGGACGAATTCCTGGTCAC                |                 |
| <i>amphI</i>             | AmIf   | GACTGGAAGGAATTCGTCGTCGTCGACCC           | 427             |
|                          | AmIr   | GCCGTCGCAAGCTTGAGGTAATCC                |                 |
| <i>amphJ</i>             | AmJf   | GCCGCCTGGATCCCGTTCGTGGACC               | 513             |
|                          | AmJr   | CAACTACGTTCTCAGCGGGGGCG                 |                 |
| <i>amphK</i>             | AmKf   | GGTGTGCGGATCCCGTCCACGC                  | 451             |
|                          | AmKr   | GGTCTGGTGGGGATCCGCCGTGACC               |                 |

<sup>a</sup> Introduced restriction sites are underlined.

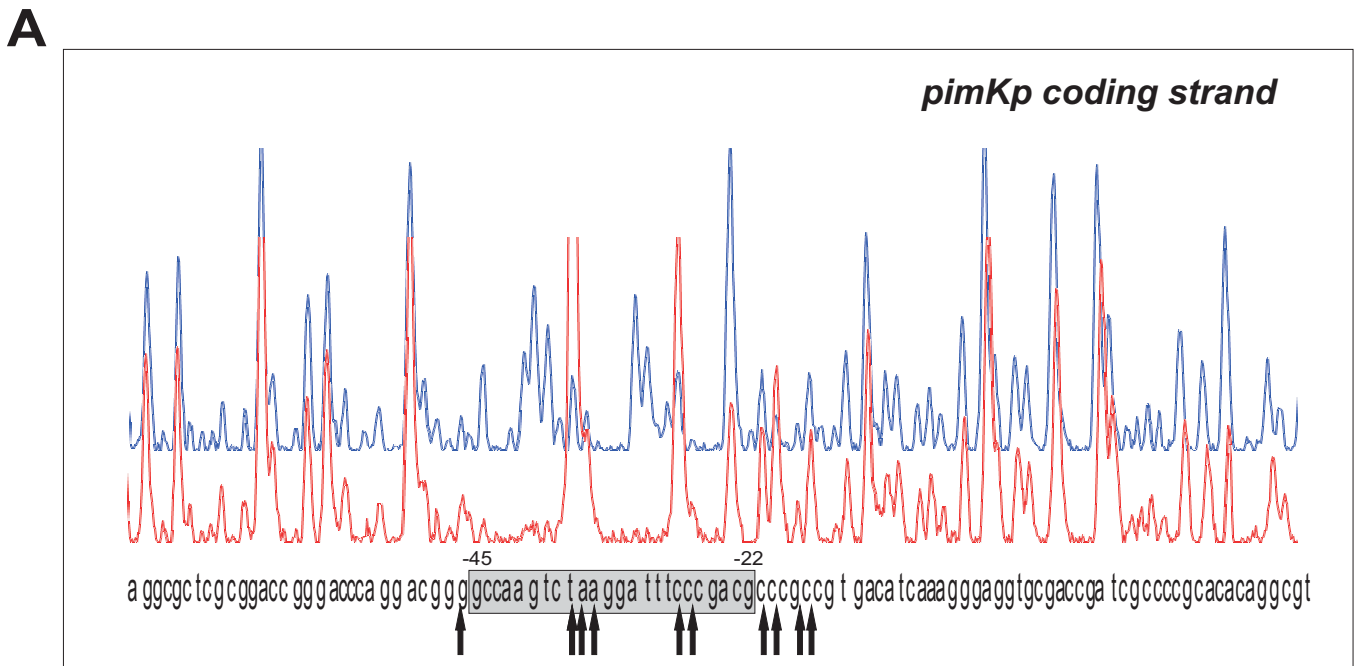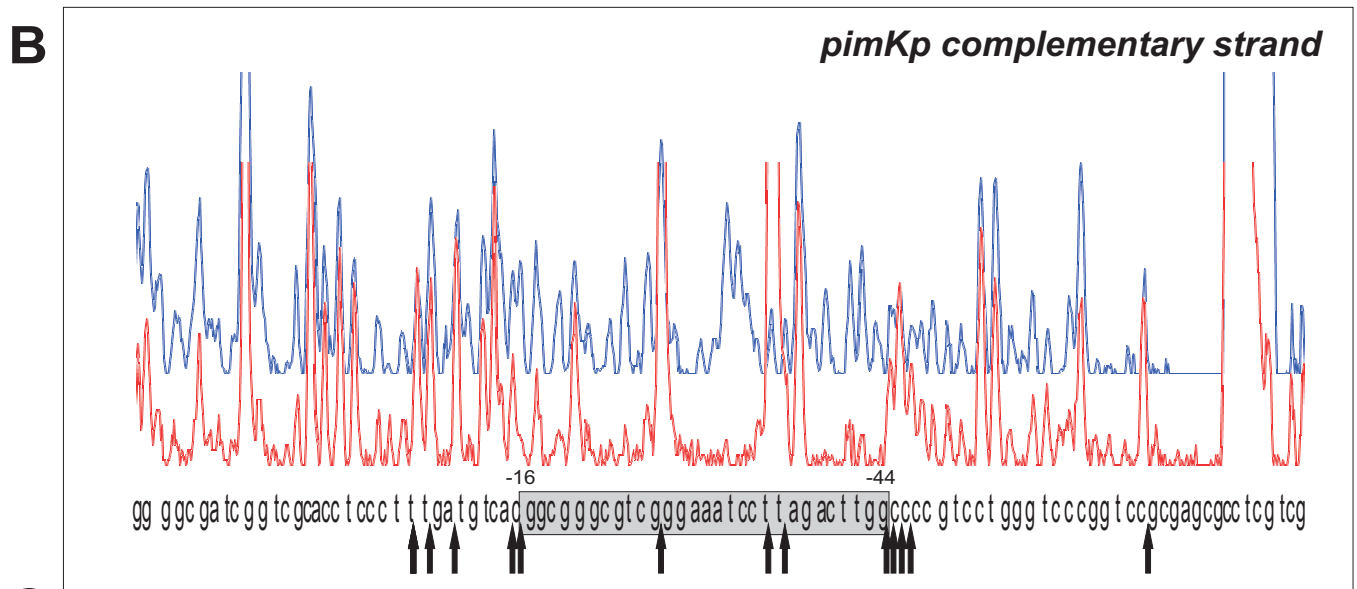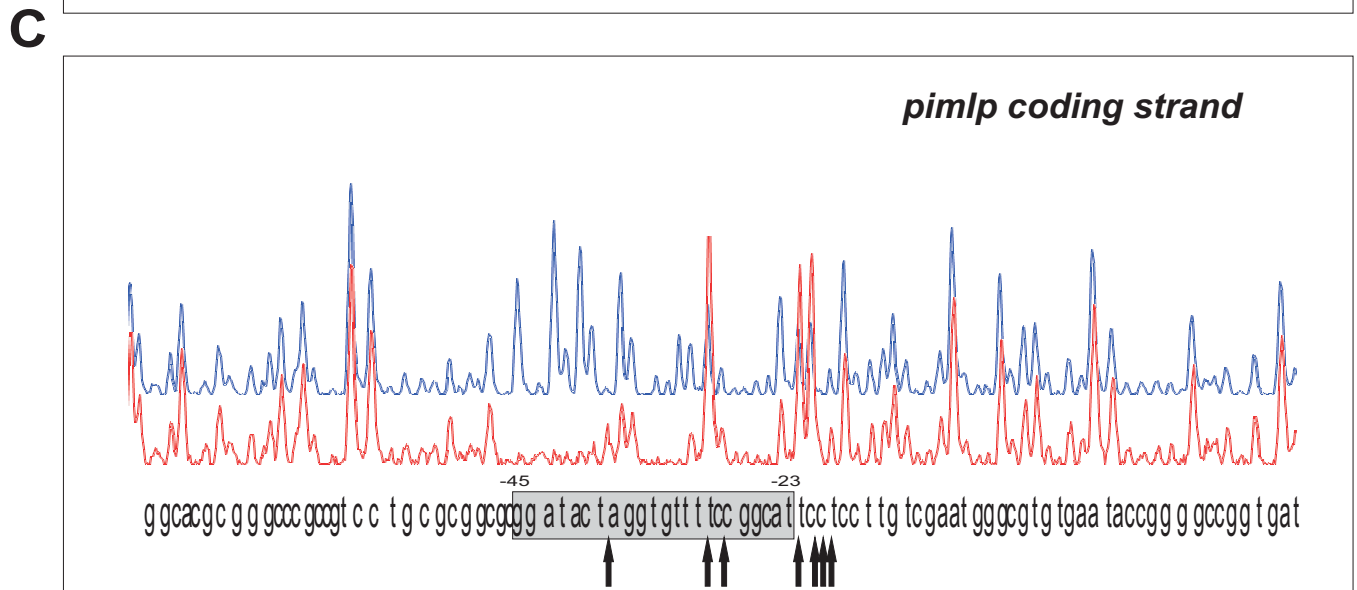

**D**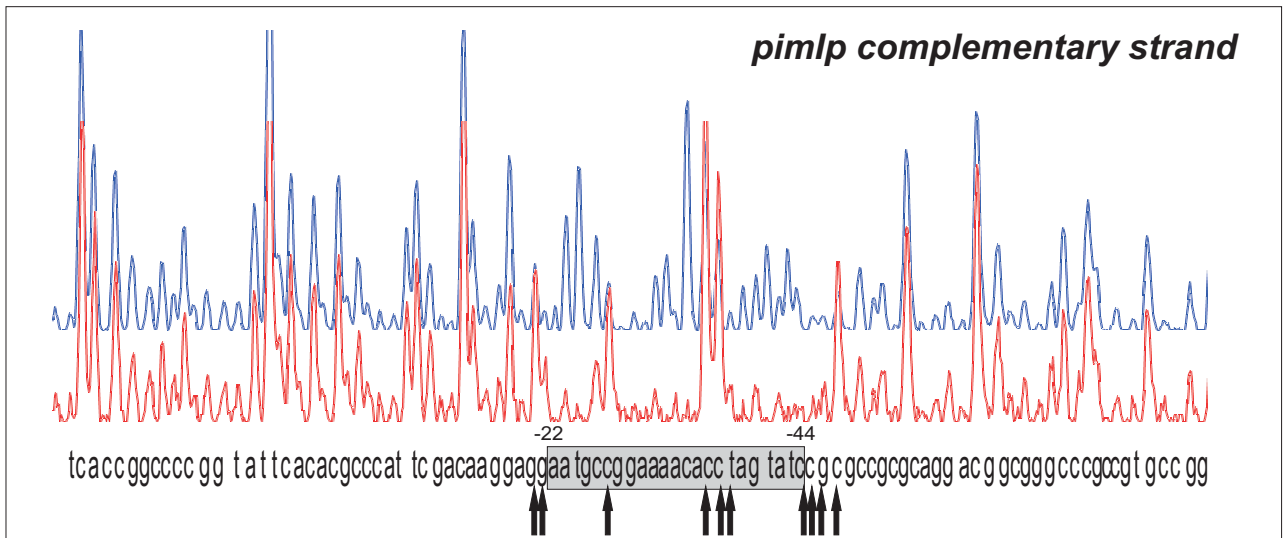**E**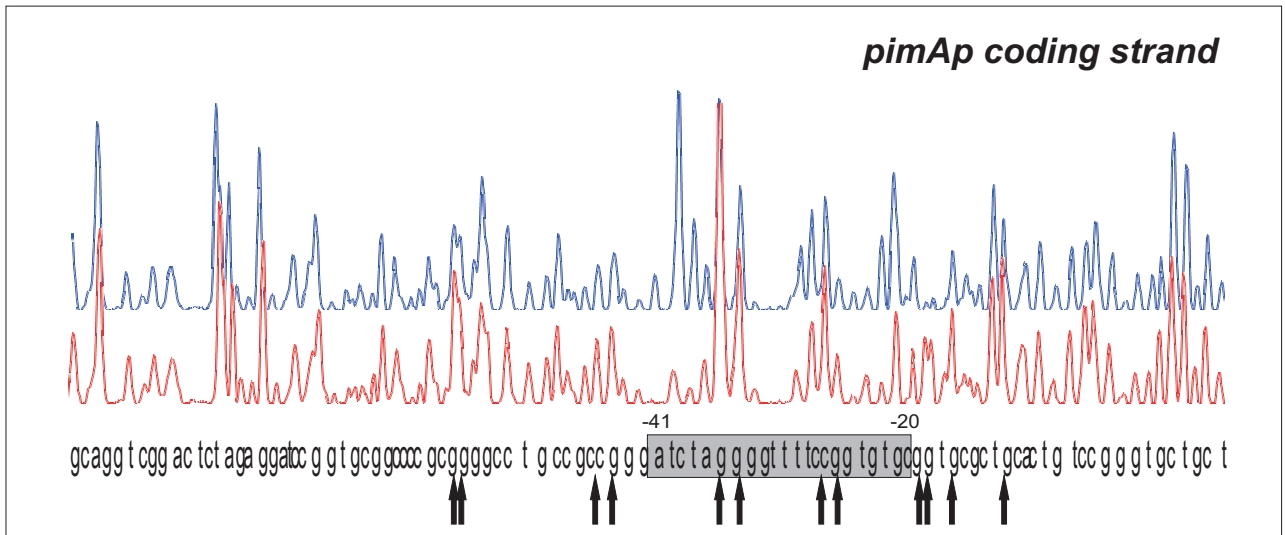**F**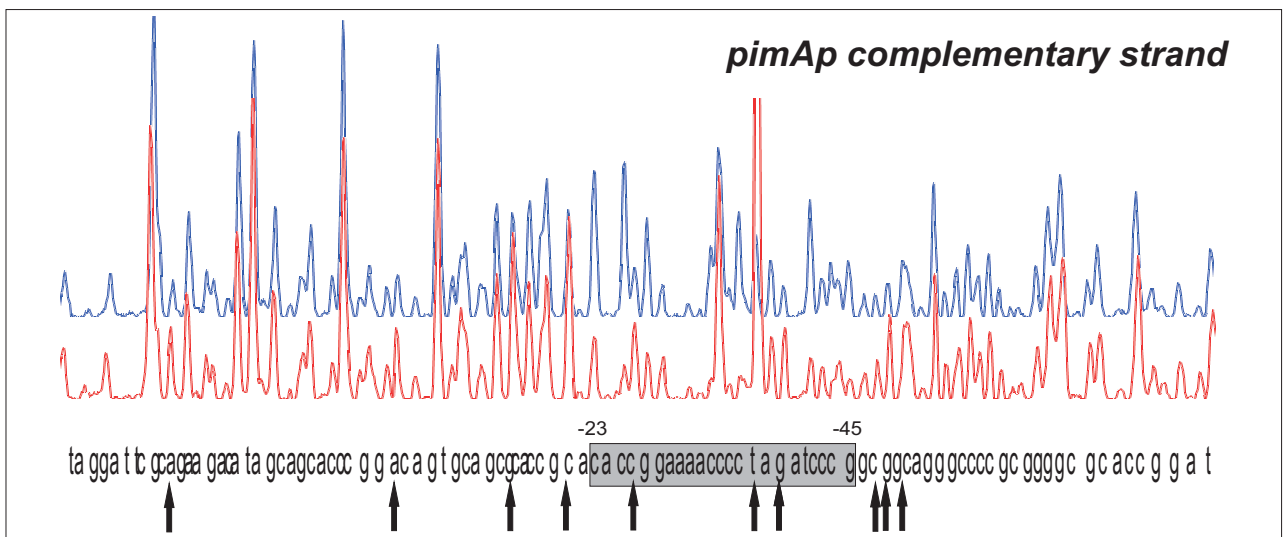

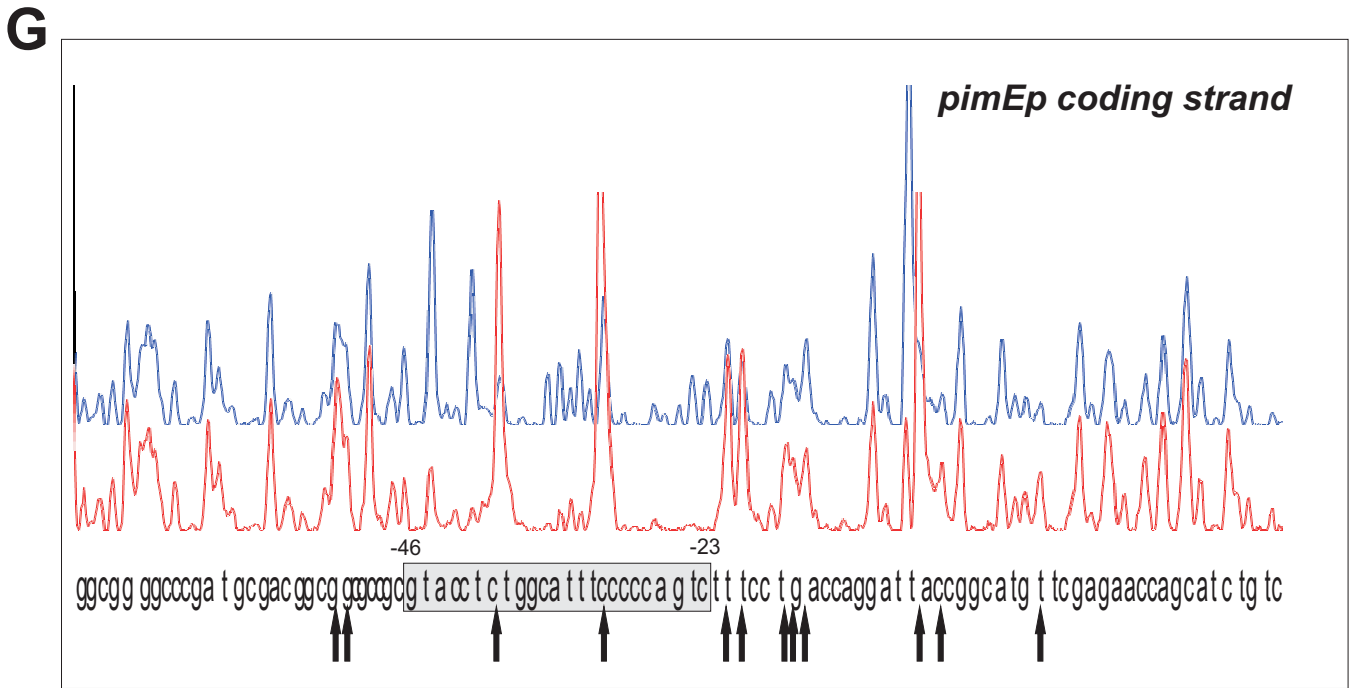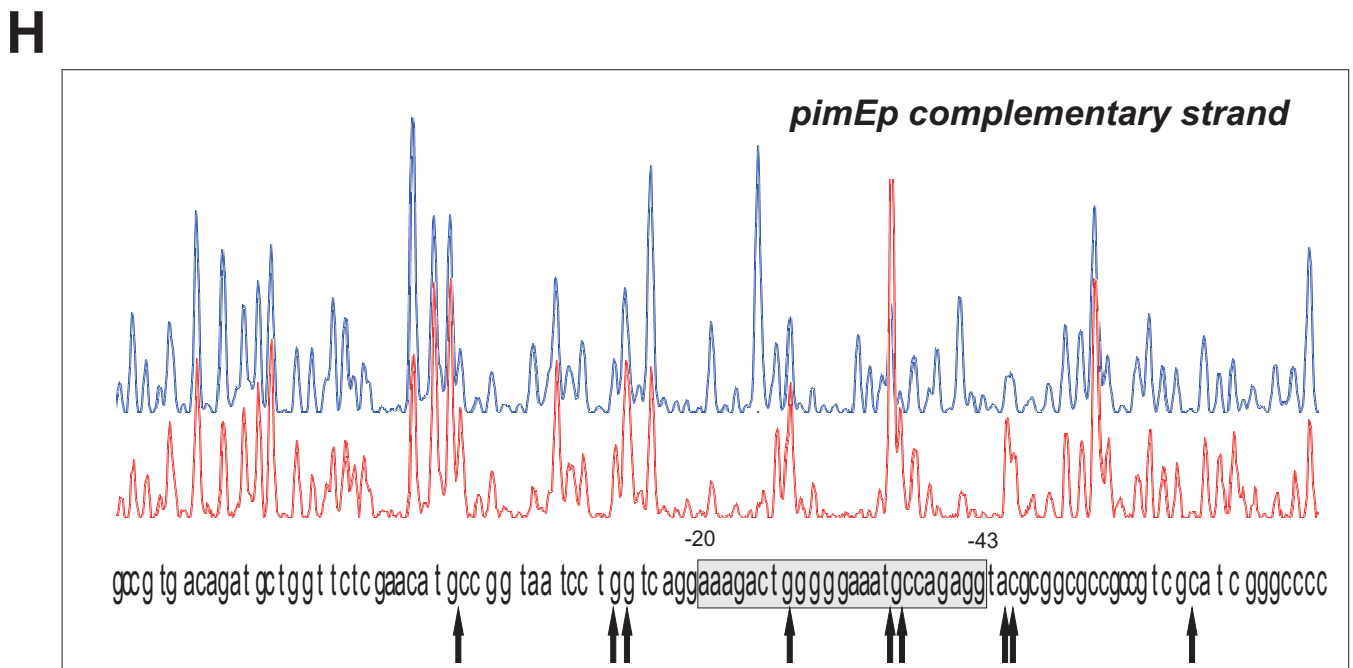

Supplement: supp_M110.182428_jbc.M110.182428-1.pdf [file supp_M110.182428_jbc.M110.182428-1.pdf]
